# Supplementary material for: Addressing Current Challenges in OSL Dosimetry Using MgB4O7:Ce,Li: State of the Art, Limitations and Avenues of Research
Source: MDPI journal article supplement (doi:10.3390/ma16083051), 2023-04-12
Supplement: s1 [file s1]

# Addressing Current Challenges in OSL Dosimetry Using $\text{MgB}_4\text{O}_7\text{:Ce,Li}$ : State of the Art, Limitations and Avenues of Research

Lily Bossin <sup>1,\*</sup>, Igor Plokhikh <sup>1,2</sup>, Jeppe Brage Christensen <sup>1</sup>, Dariusz Jakub Gawryluk <sup>2</sup>, Yuuki Kitagawa <sup>3</sup>, Paul Leblans <sup>4</sup>, Setsuhisa Tanabe <sup>5</sup>, Dirk Vandenbroucke <sup>4</sup> and Eduardo Gardenali Yukihara <sup>1</sup>

<sup>1</sup> Department of Radiation Safety and Security, Paul Scherrer Institute, Forschungsstrasse 111, 5232 Villigen, Switzerland; eduardo.yukihara@psi.ch (E.G.Y.)

<sup>2</sup> Laboratory for Multiscale Materials Experiments, Paul Scherrer Institute, Forschungsstrasse 111, 5232 Villigen, Switzerland

<sup>3</sup> National Institute of Advanced Industrial Science and Technology (AIST), Ikeda, Osaka 563-8577, Japan

<sup>4</sup> Radiology Division, Agfa NV, 2640 Mortsel, Belgium

<sup>5</sup> Graduate School of Human and Environmental Studies, Kyoto University, Kyoto 606-8501, Japan

\* Correspondence: lily.bossin@psi.ch; Tel.: +41-56-310-54-30

## 1 OSL and TL intensity - comparison with BeO

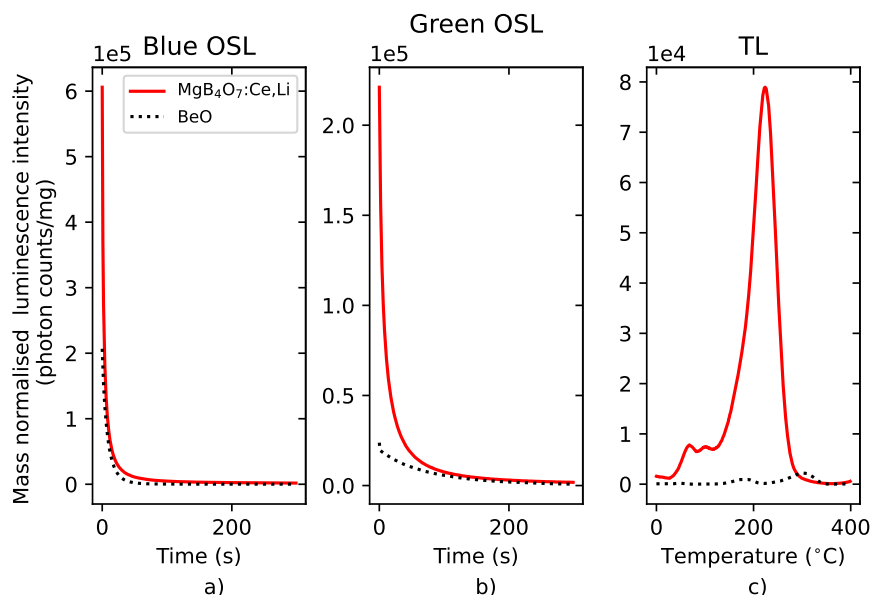

Figure S1: Intensity comparison of the mass normalised signals of  $\text{MgB}_4\text{O}_7\text{:Ce,Li}$  and BeO under continuous-wave blue stimulation (a), green stimulation (b) and thermal stimulation (c) following  $\beta$  irradiation 350 mGy. Detection unit: PMT 9235QB; a,b) U-340 filter, c) BG-39.

---

\*E-mail: lily.bossin@psi.ch

## 2 Time-resolved luminescence - comparison with BeO

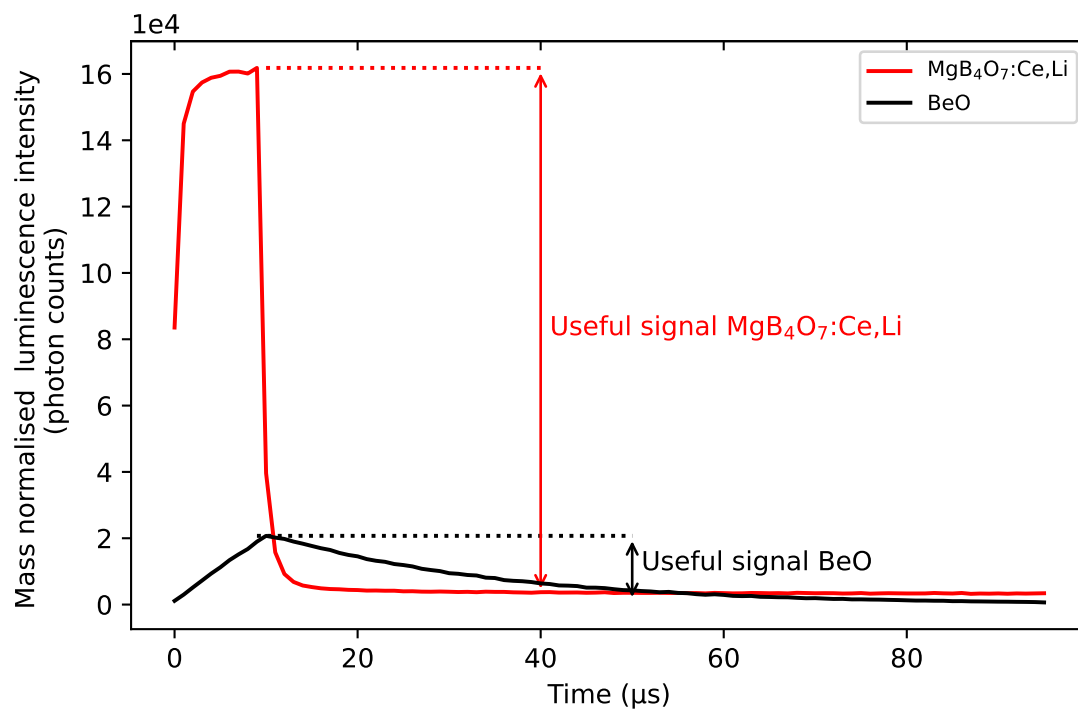

Figure S2: Photon arrival time distribution curves of  $\text{MgB}_4\text{O}_7:\text{Ce,Li}$  and  $\text{BeO}$  following blue stimulation pulse  $10\text{ }\mu\text{s}$ , following  $\beta$  irradiation  $350\text{ mGy}$ . Detection unit: PMT 9235QB; U-340 filter.
